# Supplementary material for: Unravelling the effect of fluorinated ligands in hybrid EUV photoresists by X-ray spectroscopy
Source: Royal Society of Chemistry journal article supplement (doi:10.1039/d0tc03216f), 2020-01-01
Supplement: d0tc03216f1.pdf [file d0tc03216f1.pdf]

## Unravelling the effect of fluorinated ligands in hybrid EUV photoresists by X-ray spectroscopy

Lianjia Wu,<sup>a</sup> Ivan Bernalov,<sup>a</sup> Katharina Witte,<sup>b</sup> Olivier Lugier,<sup>a</sup> Jarich Haitjema,<sup>a</sup> Michaela Vockenhuber,<sup>b</sup> Yasin Ekinci,<sup>b</sup> Benjamin Watts,<sup>b</sup> Albert M. Brouwer,<sup>ac</sup> and Sonia Castellanos<sup>\*a</sup>

<sup>a</sup> Advanced Research Center for Nanolithography, Science Park 106, 1098 XG Amsterdam, the Netherlands. E-mail: s.castellanos@arcnl.nl

<sup>b</sup> Paul Scherrer Institute, Forschungstrasse 111, Villigen 5232, Switzerland.

<sup>c</sup> van't Hoff Institute for Molecular Sciences, University of Amsterdam, Science Park 904, 1098 XH Amsterdam, the Netherlands.

### Supporting Information

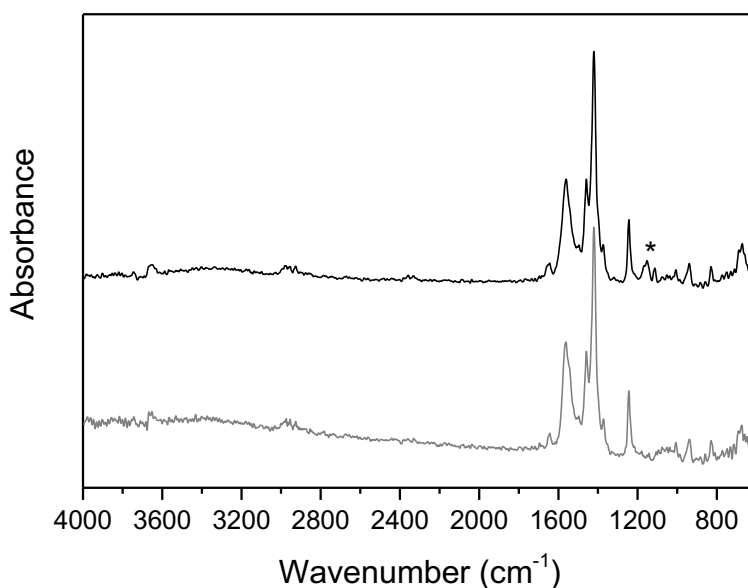

**Figure S1** Fourier transform infrared (FTIR) spectra of **ZrMc** (in grey) and **ZrMcF** (in black) thin films, offset for clarity. The absorption band at 1100–1200  $\text{cm}^{-1}$  (asterisk) with peaks at 1118, 1149 and 1167  $\text{cm}^{-1}$  is assigned to C-F stretching from the trifluoromethacrylate ligand in the molecule.

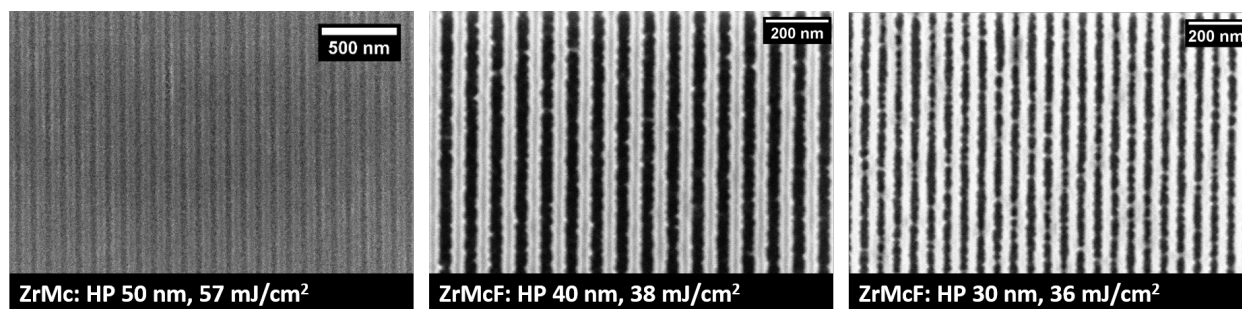

**Figure S2** Selected SEM pictures of dense lines patterns printed with EUV interference lithography on **ZrMc** and **ZrMcF** (HP = half-pitch).

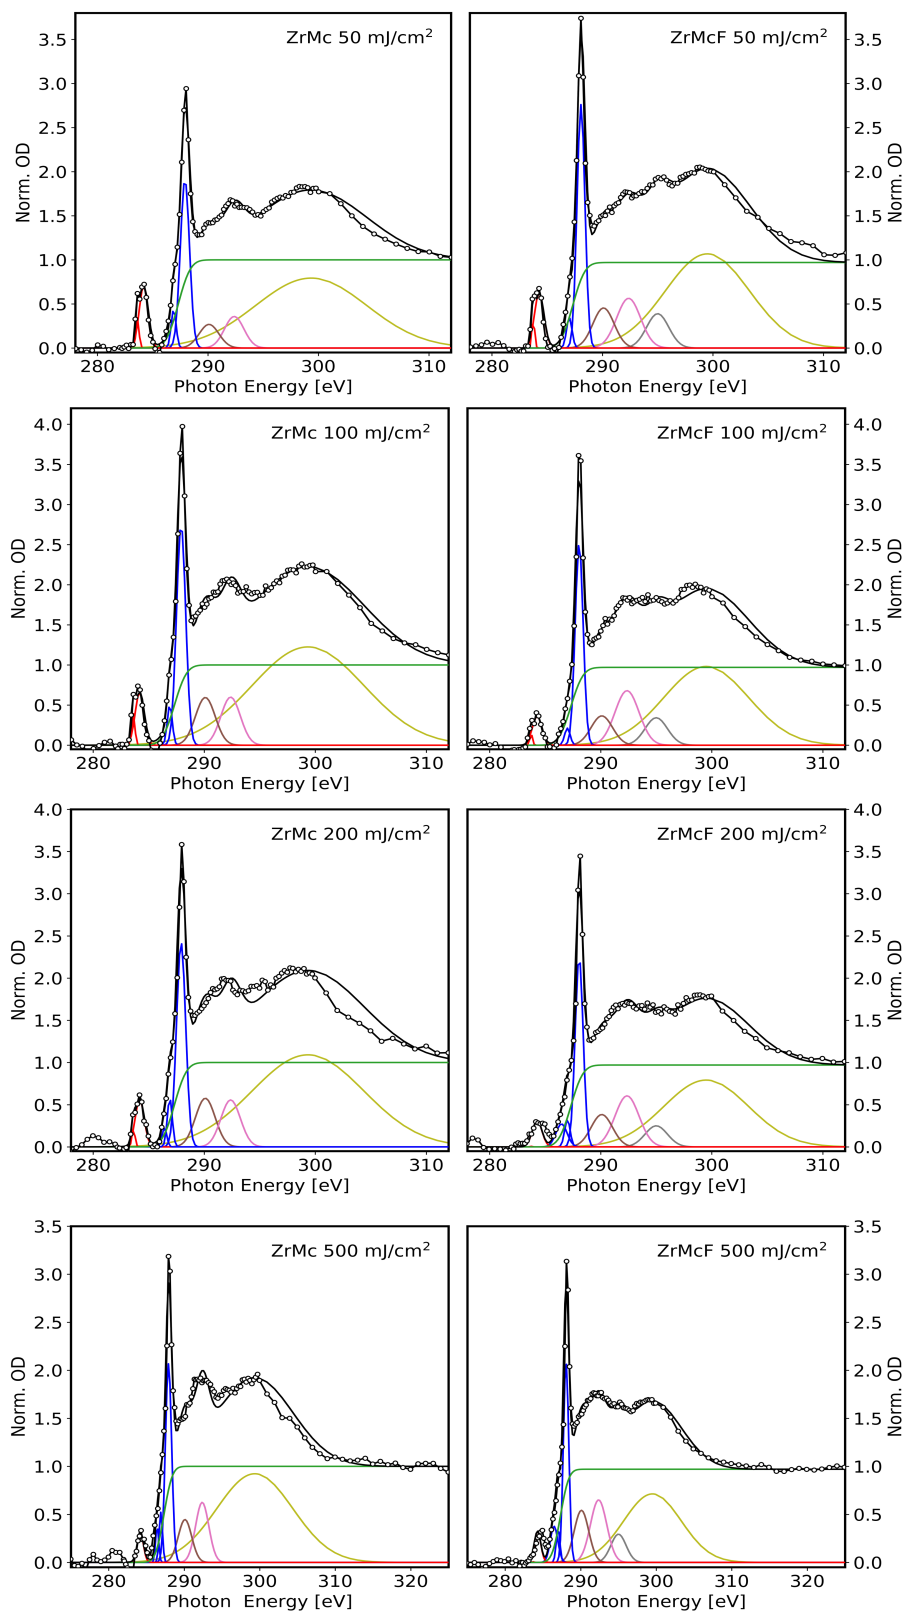

**Figure S3** Fitted C K-edge NEXAFS spectra of areas on **ZrMc** and **ZrMcF** exposed to EUV.

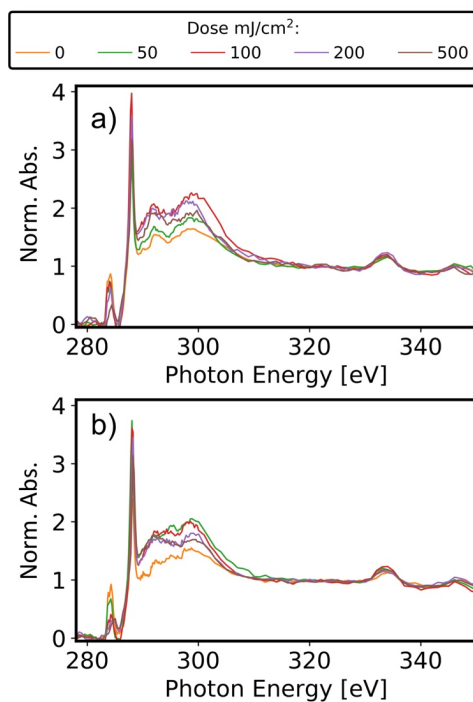

**Figure S4** C K-edge NEXAFS spectra of a) **ZrMc** and b) **ZrMcF** before and after exposure normalized to the continuum and extended to photon energies where the peaks of the Zr  $M_{2,3}$ -edge (333.8 eV and 346.5 eV) are observed.

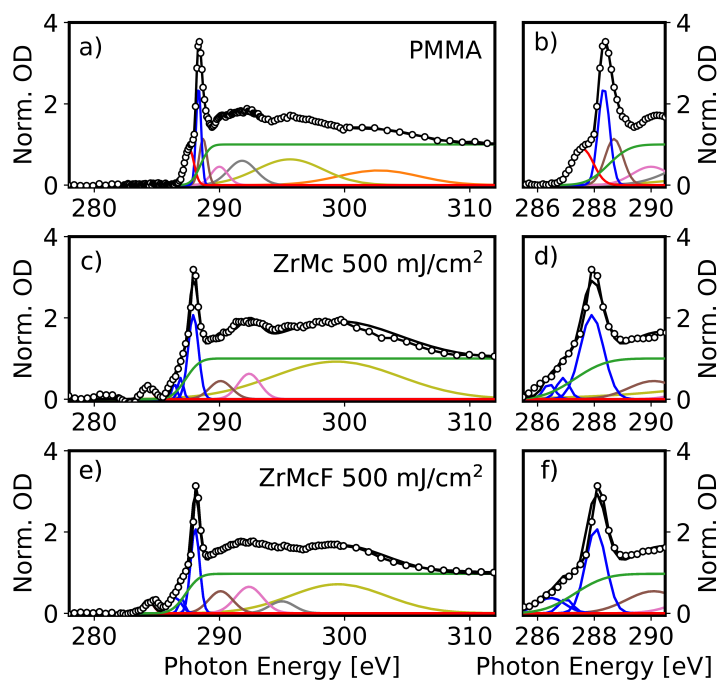

**Figure S5** Comparison of the C K-edge spectrum of PMMA with the spectra of **ZrMc** and **ZrMcF** after exposure to the highest EUV dose (500 mJ/cm<sup>2</sup>).

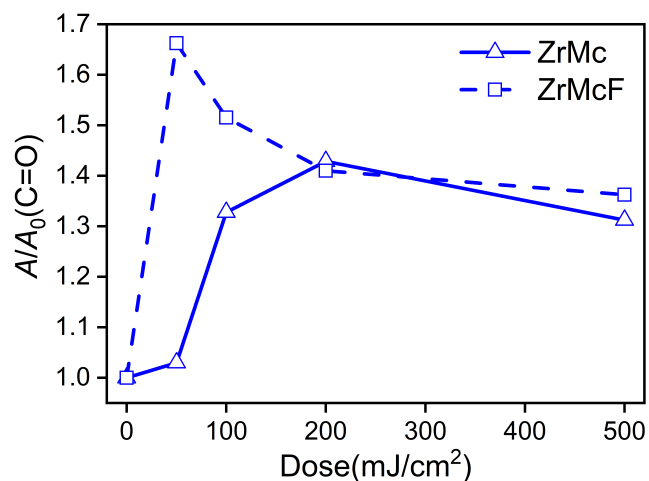

**Figure S6** Added absorbance values of the fitted peaks in the normalised spectra associated to C 1s  $\rightarrow$   $\pi^*$  (C=O) electronic transition ( $A_{286.9} + A_{287.9}$ ) relative to the absorbance values in the unexposed sample ( $A/A_0$ ).

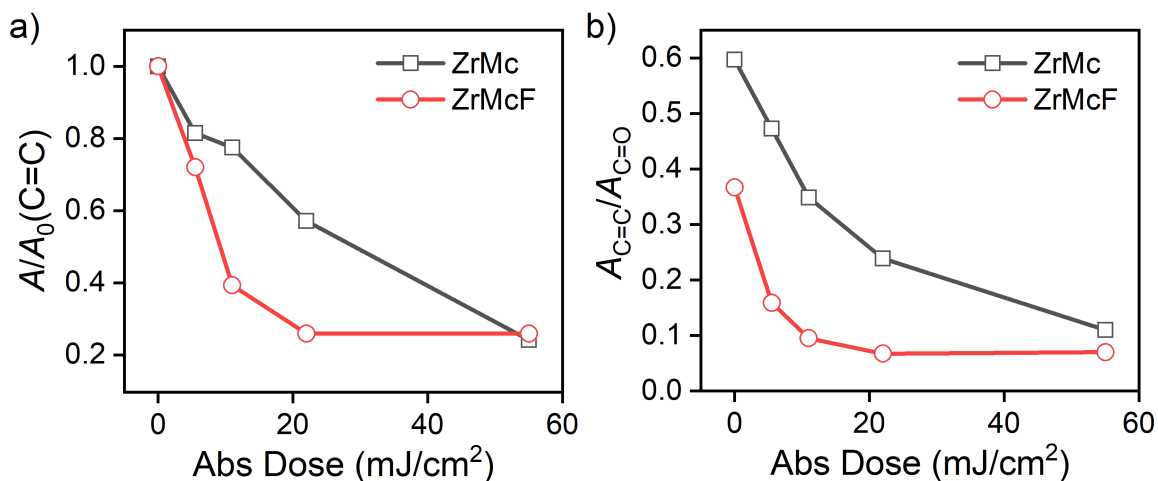

**Figure S7** (Replotted from Fig. 4.) Evolution of the absorbance value ( $A$ ) of some fitted peaks in normalized spectra as a function of estimated absorbed dose, where the absorbed dose = incident dose \* (100% -  $T$ ) and  $T = \exp(-\alpha \cdot d)$ . **a)** Absorbance of peaks assigned to C 1s  $\rightarrow$   $\pi^*$  (C=C) ( $A_{283.6} + A_{284.2}$ ) relative to initial values ( $A/A_0$ ); **b)** Absorbance ratio between peaks assigned to C 1s  $\rightarrow$   $\pi^*$  (C=C) ( $A_{283.6} + A_{284.2}$ ) and to C 1s  $\rightarrow$   $\pi^*$  (C=O) ( $A_{286.9} + A_{287.9}$ ).

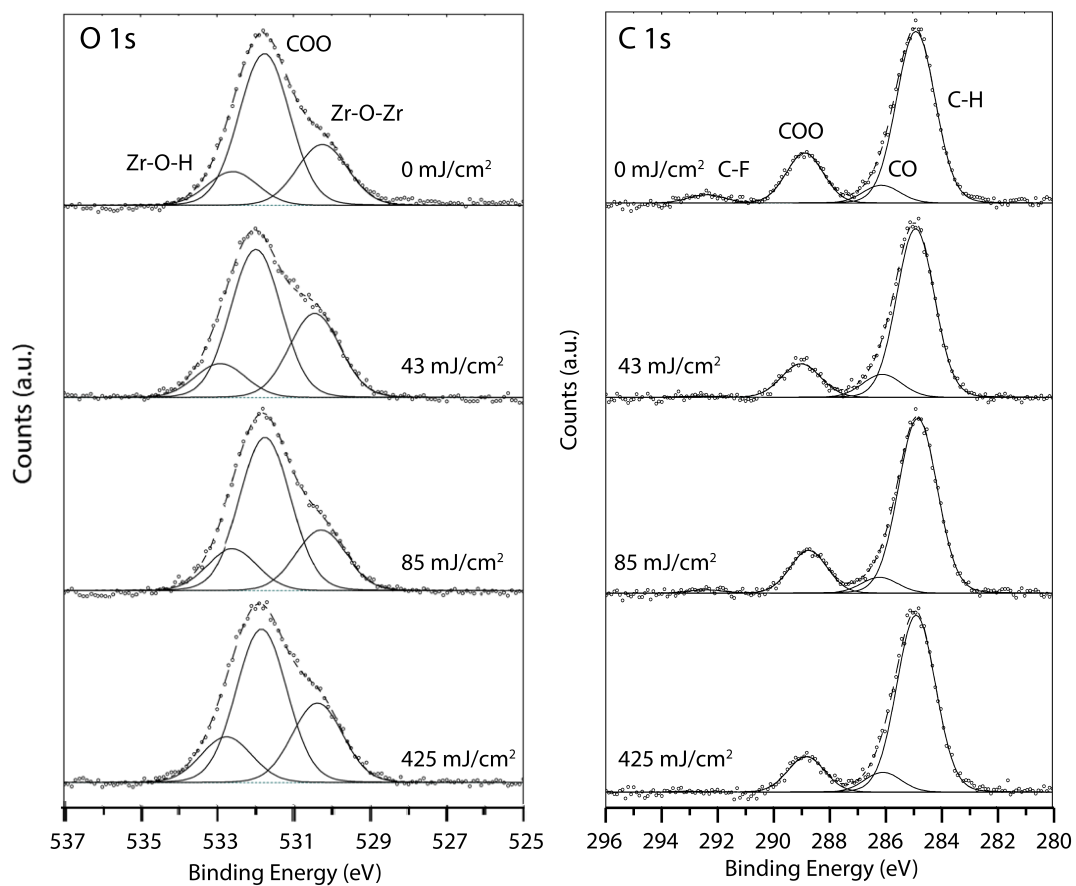

**Figure S8** High-resolution XPS spectra of the O 1s and C 1s peaks of the unexposed and the exposed **ZrMcF** resist.

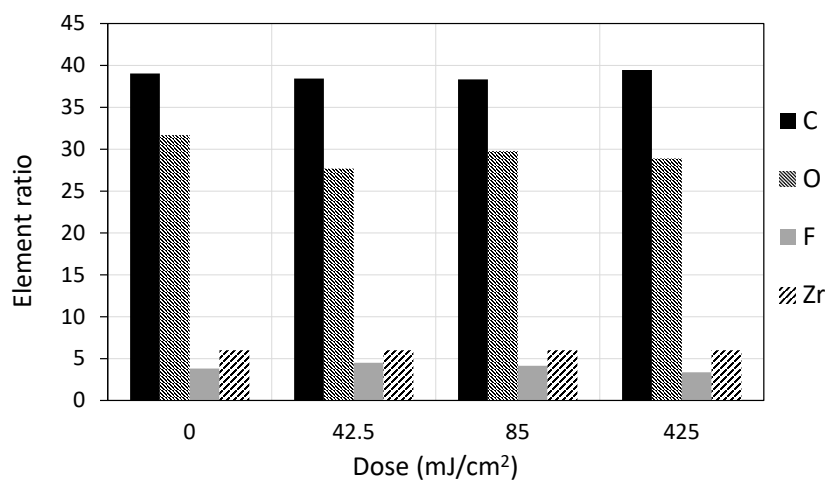

**Figure S9** Elemental ratio recorded with XPS of **ZrMcF** thin films before and after exposure to different doses of EUV light.
